# Supplementary material for: A new instrument for stable isotope measurements of 13 C and 18 O in CO 2 – instrument performance and ecological application of the Delta Ray IRIS analyzer
Source: Copernicus journal article supplement (doi:10.5194/amt-10-4537-2017), 2017-11-24
Supplement: Supplementary file 1 [file amt-10-4537-2017-supplement.zip]

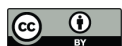

## *Supplement of*

# **A new instrument for stable isotope measurements of $^{13}\text{C}$ and $^{18}\text{O}$ in $\text{CO}_2$ – instrument performance and ecological application of the Delta Ray IRIS analyzer**

**Jelka Braden-Behrens et al.**

*Correspondence to:* Jelka Braden-Behrens (jbraden1@gwdg.de)

- amt-10-4537-2017-supplement-title-page.pdf
- SupplementaryMaterial\_2
  - Data\_For\_Plot\_fig01\_Spectrum.csv
  - Data\_For\_Plot\_fig03\_AllanDev.csv
  - Data\_For\_Plot\_fig04\_Concentration\_Dependency\_Fit.csv
  - Data\_For\_Plot\_fig04\_Concentration\_Dependency\_PointsForFit.csv
  - Data\_For\_Plot\_fig04\_Concentration\_Dependency\_boxplot.csv
  - Data\_For\_Plot\_fig04\_TargetStandardAndMetaData.csv
  - Data\_For\_Plot\_fig06\_TemporalChangesInLinearCalibrations.csv
  - Data\_For\_Plot\_fig07\_TargetStandardAndMetaData.csv
  - Data\_For\_Plot\_fig08\_Turnover13C.csv
  - Data\_For\_Plot\_fig09\_SeasonalVariability\_CandDelta.csv
  - Data\_For\_Plot\_fig10\_SeasonalVariabilityWithMeteoData\_Part1IsotopeData.csv
  - Data\_For\_Plot\_fig10\_SeasonalVariabilityWithMeteoData\_Part2MeteoData.csv
  - Data\_For\_Plot\_fig11\_ThreeRelevantCorrelations.csv
  - Data\_For\_Plot\_fig12\_CorrelationsBeforeAndAfterTheSnowPanel1.csv
  - Data\_For\_Plot\_fig12\_CorrelationsBeforeAndAfterTheSnowPanel2.csv
  - Data\_For\_Plot\_fig12\_CorrelationsBeforeAndAfterTheSnowPanel3.csv
  - Data\_For\_Plot\_fig12\_CorrelationsBeforeAndAfterTheSnowPanel4.csv
  - Data\_for\_Plot\_fig05\_LinearCalibrations.csv
  - SupplementaryMaterial.pdf

The copyright of individual parts of the supplement might differ from the CC BY 3.0 License.
